# Supplementary material for: Protective anti-gB neutralizing antibodies targeting two vulnerable sites for EBV-cell membrane fusion
Source: PubMed Central journal article supplement — Proc Natl Acad Sci U S A. 2022 Aug 2;119(32):e2202371119. doi: 10.1073/pnas.2202371119 (PMC9371650; doi:10.1073/pnas.2202371119), 2022-08-02
Supplement: pnas.2202371119.sapp.pdf [file pnas.2202371119.sapp.pdf]

## Supplementary Information

|                                    |           |
|------------------------------------|-----------|
| <b>Materials and Methods</b> ..... | <b>2</b>  |
| <b>Supplementary Figures</b> ..... | <b>17</b> |
| <b>Supplementary Tables</b> .....  | <b>34</b> |

## 1 **Materials and Methods**

2

### 3 **Plasmids**

4 The coding sequence of the gB ectodomain (residues 22-672) (GenBank access no.  
5 BAU51603.1) was cloned from the M81 strain with residues WY<sup>112-113</sup> and  
6 WLIW<sup>193-196</sup> replaced with HSV-1 residues HR<sup>177-178</sup> and RVEA<sup>258-261</sup>, respectively (1).  
7 This gB ectodomain sequence was cloned into a pCDNA3.1(+) vector with a  
8 C-terminal 6× His tag at the C-terminus and an N-terminal CD5 signal peptide for  
9 protein secretion.

10 The full-length complementary DNA (cDNA) sequence of NRP1 was PCR-amplified  
11 using cDNA from HK1 cells and then integrated into the pCDNA3.1(+) vector with a  
12 C-terminal 6× His tag at the C-terminus, and an N-terminal CD5 signal peptide for  
13 protein secretion.

14 The full-length sequences of gB and gp350 were PCR-amplified using the bacterial  
15 artificial chromosome (BAC) of EBV-M81 and then inserted into the pCDH vector.  
16 gHgL (full-length gL linked with full-length gH by a (G<sub>4</sub>S)<sub>3</sub> linker) was also inserted  
17 into the pCDH vector.

18 Full-length BALF5 was PCR-amplified from EBV-M81 BAC and then inserted into  
19 the pUC19 vector. pUC19-BALF5 was used to plot the standard curve for determining  
20 the EBV DNA copies.

21 pCAGGS expression plasmids for gH, gL, gB, T7, and pT7EMCLuc (which carries a  
22 luciferase-containing reporter plasmid under the control of the T7 promoter) were  
23 kindly provided by Professor Richard Longnecker.

24 For the single alanine substitutions of gB-E345A, N348A, K349A, H352A, E353A,  
25 E356A, Q359A, D360A, R388A, L390A, R539A, K540A, S558A, T565A, K566A,  
26 T567A, H610A, F611A, K612A and T613A, the expression plasmids were directly  
27 obtained by PCR amplification using paired primers harboring each point mutation,  
28 and then the template plasmids were digested with Dpn I (Thermo Fisher Scientific)  
29 following the manufacturer's instructions before the transformation. All mutants were

30 also tagged with 6× His. The sequences of all plasmids were verified by Sanger  
31 sequencing.

32

### 33 **Expression and purification of proteins and antibodies**

34 According to the manufacturer's instructions, plasmids encoding wild-type gB  
35 (gB-WT), mutant gB, NRP1, or antibody heavy and light chains were transiently  
36 transfected into 293F cells using polyetherimide. The supernatant was collected at 5-7  
37 days post transfection and filtered through 0.22 μm filters. The gB-WT and mutant gB  
38 were further purified with Ni<sup>2+</sup> Sepharose™ 6 Fast Flow beads (GE Healthcare). The  
39 target proteins were eluted by elution buffer (80 mM imidazole, 20 mM HEPES, 250  
40 mM NaCl, pH 8.0). Purified proteins were verified by SDS-PAGE and further  
41 concentrated using a 10 kDa ultracentrifuge tube (Millipore).

42 The recombinant antibodies were purified from the supernatant using Protein A affinity  
43 chromatography (GE Health). The purified mAbs 3A3 and 3A5 were then labeled with  
44 horseradish peroxidase (HRP) by a periodate coupling method. The antigen-binding  
45 fragments (Fabs) of 3A3, 3A5, and AMMO5 were prepared by papain digestion (1:400  
46 mass ratio of papain to antibody) at 37°C for 12 hrs and further purified by a TSKgel  
47 DEAE-5PW (Tosoh Bioscience) column.

48

### 49 **Rabbit B cell isolation and recombinant antibody cloning**

50 Ten-week-old New Zealand White Rabbits (Songlian Laboratory Animal Center,  
51 Shanghai) were subcutaneously immunized with gB-WT mixed with an equal volume of  
52 Freund's adjuvant three times at 2-week intervals. After immunization, approximately 5  
53 ml of blood was collected. According to the manufacturer's instructions, peripheral  
54 blood mononuclear cells (PBMCs) were isolated by Ficoll-Paque PLUS (GE  
55 Healthcare). The PBMCs were collected and washed three times with PBS.  
56 Sulfo-NHS-LC-Biotin (Thermo Fisher Scientific) conjugated gB-His was used to sort  
57 antigen-specific B cells. PBMCs ( $1 \times 10^6$ ) were suspended in 100 μL of PBS and  
58 incubated with biotin-conjugated gB-His for 30 min at 4°C. The PBMCs were washed  
59 three times with PBS and collected by centrifugation at  $800 \times g$  for 5 min.

60 PBMCs were labeled with a panel of reagents and antibodies for sorting:  
61 LIVE/DEAD Aqua (Thermo Fisher), mouse anti-rabbit CD4: FITC (Bio-Rad), mouse  
62 anti-rabbit CD8: FITC (Bio-Rad), mouse anti-rabbit T lymphocytes: FITC (Bio-Rad),  
63 mouse anti-rabbit IgM: RPE (Bio-Rad) and streptavidin APC conjugate (Thermo  
64 Fisher).

65 B cell sorting was conducted with a BD FACS Aria III cell sorter. Antigen-positive B  
66 cells were sorted into a 96-well plate containing 293T-rCD40L feeder cells expressing  
67 rabbit CD40 ligand, 20 ng/ml human interleukin 2 (Sigma-Aldrich) and 50 ng/ml  
68 human interleukin 21 (Sigma-Aldrich). B cells were cultured *in vitro* for 7 days, and the  
69 supernatant was collected for ELISA tests.

70 The RNA of positive B cells was extracted, and cDNA was prepared using Superscript  
71 III reverse transcriptase (Invitrogen) primed with random hexamers. Antibody variable  
72 regions of heavy and light chains were recovered via nested PCR using GXL  
73 polymerase (Takara). The primary PCR used gene-specific primers to amplify the  
74 variable region genes. The secondary PCR utilized primers containing overlapping  
75 regions of the leader sequence at the 5' end and the CH1 or C $\kappa$  region at the 3' end. The  
76 PCR product was inserted into pVRC8400 vectors containing the rabbit heavy or light  
77 chain's constant region for antibody production.

78

### 79 **Indirect enzyme-linked immunosorbent assay (ELISA)**

80 Indirect ELISA was performed to determine the reactivities of the purified antibodies  
81 with gB-WT and gB mutants and to monitor the serum titers of immunized rabbits.  
82 Purified gB-WT or gB mutants (100 ng/well in PBS) were coated on 96-well ELISA  
83 plates (Corning) for 2 h at 37°C. After washing with TBST, the plates were blocked  
84 with blocking buffer (PBS containing 0.5% casein, 2% gelatin, and 0.1% ProClin 300,  
85 pH 7.4) for 2 h at 37°C.

86 To determine antibody reactivity, 2-fold serially diluted mAbs (starting from 10  $\mu$ g/ml)  
87 were added to each well and incubated for 1 h at 37°C. After washing 5 times with  
88 TBST, goat anti-rabbit antibody conjugated with HRP (Promega) diluted at a ratio of  
89 1:5000 was added and incubated for 30 min at 37°C. To determine the human serum

90 titers, 3-fold serially diluted sera (starting from 1:100) were added to plates coated with  
91 gp350, gHgL, and gB (100 ng/well) and incubated for 1 h at 37°C. After washing 5 times  
92 with TBST, goat anti-human antibody conjugated with HRP (Promega) diluted at a ratio  
93 of 1:5000 was added and incubated for 30 min at 37°C.

94 To determine rabbit serum titer, 2-fold serial dilutions of sera (starting from 1:100)  
95 were added to the plates and incubated for 1 h at 37°C. The following steps were the  
96 same as those for the reactivity detection of antibodies. The EL-TMB kit (Sangon  
97 Biotech) was used for color development. Absorbance was measured at 450 nm and 630  
98 nm using a microplate reader (Molecular Devices).

99

#### 100 **Competitive ELISA and antibody blocking assay**

101 Competitive ELISA was used to detect epitope overlap of different antibodies against  
102 gB. ELISA plates (Corning) were coated with 10 ng/well gB-WT at 4°C overnight and  
103 blocked with the above blocking buffer at 37°C for 2 h. Primary antibodies (100 µl, 10  
104 µg/ml) were added to the plates and then incubated at 37°C for 30 min. After washing  
105 five times, HRP-conjugated secondary antibodies were added and incubated at 37°C for  
106 30 min. TMB substrates were added, and the absorbance was measured at 450 nm and  
107 630 nm using a microplate reader (Molecular Devices). All samples were tested three  
108 times. The competitive ability of primary antibodies against secondary antibodies was  
109 calculated using the following equation: Percentage of competition% =

110 
$$\frac{[\text{OD}(-\text{Primary}/+\text{Secondary}) - \text{OD}(+\text{Primary}/+\text{Secondary})]}{\text{OD}(-\text{Primary}/+\text{Secondary})}$$
  
111  $\times 100\%$ .

112 Competitive ELISA was also used to detect 3A3- and 3A5-like antibodies in human  
113 sera. gB (100 ng/well) was coated in a 96-well plate. In a serially diluted pre-test ELISA,  
114 the dilution folds of human sera to produce 1 OD reading value were determined. In the  
115 blocking assays, 100 µl of mAbs 3A3, 3A5, 3A3+3A5, 1E12 or 2G9 (10 µg/well) was  
116 added and incubated at 37°C for 30 min. After five washes, the predetermined dilution of  
117 human sera with 1 OD reading was added for another 30 min. After five washes, goat  
118 anti-human IgG antibody conjugated with HRP (Promega) was added and incubated at

119 37°C for 30 min. The color was developed as in the indirect ELISA. The blocking  
120 ratio of the mAb against each serum sample (dots) was calculated as 1- (OD value of  
121 the sera binding to coated antigens treated with mAb/OD value of the sera binding to  
122 coated antigens without mAb treatment) × 100%.

123

#### 124 **Antibody blocking assay by flow cytometry**

125 1×10<sup>5</sup> 293T-gB cells were washed with 0.5% BSA in PBS three times and then  
126 incubated with 10 µg 3A3, 3A5, 3A3+3A5, 1E12, 2G9 or 50 µl 0.5% BSA in PBS at  
127 37°C for 30 min, respectively. After washing with 0.5% BSA in PBS three times, the  
128 cells were incubated with 50 µl 1:500 diluted human sera from 15 healthy donors and  
129 15 patients with NPC at 37°C for 30 min. Then the cells were washed three times with  
130 0.5% BSA in PBS and stained with goat anti-rabbit IgG AlexaFluor 488 (1:500,  
131 Invitrogen) antibody and goat anti-human IgG AlexaFluor 647 (1:500, Invitrogen)  
132 antibody at 4°C for 30 min. After being washed with 0.5% BSA in PBS three times, data  
133 were collected with CytoFLEX (Beckman Coulter) and analyzed using FlowJo  
134 software X 10.0.7 (Tree Star). Cells that were not incubated with mAbs or human sera  
135 were used as a negative control. Cells incubated without mAbs and only with human  
136 sera were used as positive controls for each blocking assay. The blocking ratio of the  
137 mAb against each serum was calculated as 1- (AF647 positive cells incubated with  
138 mAbs/AF647 positive cells incubated without mAbs) × 100%.

139

#### 140 **Immunofluorescence assay**

141 Cells overexpressing gB, gHgL, gp350, or vector were seeded on glass coverslips in  
142 12-well plates for 24 h. Cells were washed twice with PBS and fixed for 10 min with 4%  
143 paraformaldehyde at room temperature. Following fixation, the cells were incubated in  
144 blocking solution (5% BSA, 0.5% Triton X-100 in PBS) for 1 h at room temperature  
145 and incubated overnight at 4°C with primary antibodies. After being washed with PBS  
146 three times, the cells were incubated with secondary antibodies. Cells incubated  
147 without primary antibodies were used as a negative control. Images were captured with  
148 an FV1000 OLYMPUS microscope.

149 3A3 (1:200), 3A5 (1:200), AMMO5 (1:200), anti-Flag (1:200), 72A1 (1:200) or  
150 AMMO1 (1:200) was used as primary antibodies. Goat anti-rabbit IgG AlexaFluor 488  
151 (1:1000, Invitrogen), goat anti-mouse IgG AlexaFluor 488 (1:1000, Invitrogen), goat  
152 anti-human IgG AlexaFluor 488 (1:1000, Invitrogen), goat anti-rabbit IgG AlexaFluor  
153 647 (1:1000, Invitrogen), goat anti-mouse IgG AlexaFluor 647 (1:1000, Invitrogen) or  
154 goat anti-human IgG AlexaFluor 647 (1:1000, Invitrogen) was used as secondary  
155 antibodies.

156

### 157 **Antibody depletion from human sera**

158 Human sera from 45 healthy adult donors (15 sera for the antibody depletion assay and  
159 30 sera for antibody blocking assay) and 30 NPC patients (30 sera for antibody blocking  
160 assay) were collected from Sun Yat-sen University Cancer Center. All sera were treated  
161 at 56°C for 45 min to inactivate the complement, and no extra complement was added.  
162 The titers of serum antibodies against EBV antigens were also measured using  
163 commercial kits from Euroimmun (Lübeck, Germany) for VCA-IgM and VCA-IgG and  
164 IBL (Hamburg, Germany) for VCA-IgA, EA-IgA, EA-IgG, EBNA-1-IgA, and  
165 EBNA-1-IgG according to the manufacturers' instructions. Briefly, the levels of  
166 seromarkers were standardized by calculating the ratio of the optical density (OD) of the  
167 sample to that of a reference control (rOD). The positive cutoff values for the rOD were  
168 indicated by the manufacturer's instructions. A nasopharyngeal carcinoma patient is  
169 expected to be positive for VCA-IgG, VCA-IgA, EA-IgA, and EBNA-1-IgA. An  
170 asymptomatic EBV carrier is expected to be positive for VCA-IgG and EBNA-1-IgG  
171 but negative for VCA-IgA, EBNA-1-IgA, VCA-IgM and EA-IgG (2-4).

172  $3 \times 10^6$  293T cells that stably expressed gp350, gB, or gHgL were collected into  
173 individual tubes and washed with PBS twice. Then, 100  $\mu$ l human serum samples were  
174 added to each tube's 293T cell pellet. After thorough pipetting to mix sera and 293T cells,  
175 the mixture was incubated on ice for 1 h to deplete the gp350, gB, or gHgL-specific  
176 antibodies. The human serum supernatant was transferred to another tube of  
177 antigen-expressing 293T cells after centrifugation at  $200 \times g$ . Before and after 15 rounds  
178 of depletion, the total gp350, gB, and gHgL-specific IgG antibodies in each serum were

179 determined by indirect ELISA. 293T cells stably transfected with the empty vector  
180 were used as the negative control in this depletion assay. The IgG titers were  
181 calculated by the endpoint dilution method, and the OD<sub>450</sub>=0.1 was set as the  
182 cut-off value. The percentage of IgG titer reduction was calculated by the formula  
183  $(1 - \text{IgG titer}_{\text{-depleted}} / \text{IgG titer}_{\text{-before}}) \times 100\%$ , where IgG titer<sub>-depleted</sub> is each  
184 glycoprotein-specific IgG titer of the serum after the specific antibody depletion, and  
185 IgG titer<sub>-before</sub> is each glycoprotein-specific serum IgG titer before depletion.

186

### 187 **Binding to induced Akata-EBV-GFP cells**

188 The EBV-positive Akata cells were induced at 37°C by goat anti-human IgG (0.8%  
189 v/v) in RPMI 1640 without FBS at a cell density of  $2 \times 10^6$  cells/ml for 6 hrs and  
190 subsequently cultured in fresh RPMI 1640 with 10% FBS for 48 hrs. Then, the cells  
191 were washed with PBS and collected for the binding assay. Single-cell suspensions  
192 were incubated with anti-human FcR block (BioLegend) for 30 min at 4°C, fixed and  
193 permeabilized with Fixation Buffer/Permeabilization Wash Buffer (BioLegend) and  
194 stained with 3A3 (1:200), 3A5 (1:200), AMMO5 (1:200) and anti-Flag (1:200) for 30  
195 min at room temperature. After being washed three times with PBS, cells were  
196 incubated with goat anti-rabbit IgG Alexa Fluor 488 (1:1000, Invitrogen), goat  
197 anti-mouse IgG Alexa Fluor 488 (1:1000, Invitrogen), and goat anti-human IgG Alexa  
198 Fluor 488 (1:1000, Invitrogen) secondary antibodies. Cells incubated without primary  
199 antibodies were used as the negative control. Data were collected with CytoFLEX  
200 (Beckman Coulter) and analyzed using FlowJo software X 10.0.7 (Tree Star).

201

### 202 **Cryo-EM sample preparation and data collection**

203 Complexes of gB:3A3Fab, gB:3A5Fab and gB:3A3Fab:3A5Fab (molar ratios of 1:4,  
204 1:4 and 1:4:4) were prepared respectively and purified by TSK-Gel 3000PWxl  
205 (TOSOH) and then concentrated to 2 mg/ml. Aliquots (3 µl) of purified immune  
206 complexes were deposited onto fresh glow-discharged holey carbon Quantifoil Cu  
207 grids (R1.2/1.3, 200 meshes, Quantifoil Micro Tools). Grids were blotted for 6 s at 100%  
208 humidity and 4°C for plunge-freezing (Vitrobot Mark IV, FEI) in liquid ethane cooled



209 by liquid nitrogen. Cryo-EM datasets of gB:3A3Fab and gB:3A5Fab were recorded on  
210 a FEI Tecnai F30 TEM equipped with a Falcon3 direct electron detector at a nominal  
211 magnification of 93,000  $\times$ , corresponding to a pixel size of 1.12 Å. 771 and 734 movies  
212 were collected for gB:3A3Fab and gB:3A5Fab complexes, respectively. The dataset of  
213 gB:3A3Fab:3A5Fab was recorded on a FEI Titan Krios equipped with a Gatan imaging  
214 filter (GIF) and a post-GIF Gatan K2 Summit direct electron detector at a nominal  
215 magnification of 21,000  $\times$ , corresponding to a pixel size of 1.1 Å. 4,779 movies were  
216 collected for gB:3A3Fab:3A5Fab complex. The total electron dose of each movie was  
217 approximately 60 e-/Å<sup>2</sup>, which was fractionated into 39 frames (Falcon3) or 40 frames  
218 (K2-summit) with an exposure time of 1 s (Falcon3) or 8 s (K2-summit), respectively.  
219 Data were automatically collected using FEI EPU on F30 TEM and SerialEM  
220 software(5) on Titan Krios TEM.

221

## 222 **Image processing and three-dimensional reconstruction**

223 Frames of each movie were aligned and motion corrected using MotionCor2 (6), and  
224 the contrast transfer function parameters of micrographs were determined with Gctf (7).  
225 Micrographs with excessive drift or astigmatism were discarded before reconstruction.  
226 Particles were automatically picked and screened using Gautomatch  
227 (<https://www2.mrc-lmb.cam.ac.uk/research/locally-developed-software/zhang-software/#gauto>) or cryoSPARC 2.4.2 (8). The initial 3D models of each dataset were generated  
228 with a random model method using cryoSPARC 2.4.2. To select good particles for  
229 further refinement, multiple rounds of reference-free two-dimensional (2D)  
230 classification were performed using cryoSPARC 2.4.2 or Relion 2.1 (9). For gB:3A3Fab  
231 and gB:3A5Fab, 9,270 and 18,826 2D particles were subjected to final homogenous  
232 refinement using cryoSPARC 2.4.2 to obtain the moderate resolution density maps of  
233 two immune-complexes. For gB:3A3Fab:3A5Fab complex, 3D classification was  
234 performed with 463,280 particles using Relion 2.1, and 367,966 good classes were then  
235 selected for further refinement and post-processing by software cisTEM (10). The final  
236 resolutions of all reconstructions were evaluated using the gold-standard Fourier shell  
237 correlation (threshold = 0.143 criterion) (11). The local resolution was evaluated by  
238

239 ResMap (12).

240

### 241 **Model building and refinement**

242 The X-ray crystal structure of gB (PDB code: 3FVC), which served as a homology  
243 model, was fitted into the segmented volume of the final cryo-EM density map of  
244 gB:3A3Fab:3A5Fab using UCSF Chimera (13) and rebuilt with Coot (14). For 3A3Fab  
245 and 3A5Fab, the initial atomic models for the variable domains of Fabs were generated  
246 by homology modeling using Accelrys Discovery Studio software  
247 (<https://www.3dsbiovia.com/products/collaborative-science/biovia-discovery-studio/>  
248 ). The models were further improved using phenix.real\_space\_refine in PHENIX (15).  
249 The model statistics, including bond lengths, bond angles, all-atom clashes, rotamer  
250 statistics, and Ramachandran plot statistics, were closely inspected with Coot  
251 throughout the process. The final atomic models were validated using MolProbity (16).  
252 Model statistics are summarized in Table S2. The buried area of the interaction  
253 interface between each Fab and one protomer of gB trimer was analyzed using the  
254 PISA server (<https://www.ebi.ac.uk/pdbe/pisa/>) and the CCP4 program suite (17) with  
255 donor-to-acceptor distances  $\leq 4$  Å for hydrogen bonding interactions. All figures were  
256 generated with UCSF Chimera or PyMOL (<https://pymol.org/2/>).

257

### 258 **Virus production**

259 Akata-EBV-GFP cells were resuspended in RPMI 1640 to a density of  $2 \times 10^6$   
260 cells/ml. Goat anti-human IgG (Tianfun Xinqu Zhenglong Biochem.Lab) was added to  
261 the cell suspension at a concentration of 0.8% (v/v) to induce EBV production for 6 h.  
262 CNE2-EBV-GFP cells were induced by 12-O-tetradecanoylphorbol 13-acetate (TPA)  
263 (20 ng/ml) and sodium butyrate (2.5 mM) for 12 h. After culture in fresh RPMI 1640  
264 with 10% FBS for 72 h, the supernatant was filtered through 0.45 µm filters to collect  
265 the virus. The EBV virus was further concentrated 100-fold by centrifugation at 50,000  
266  $\times g$  for 2.5 h and resuspended in fresh RPMI 1640 without FBS. The EBV virus was  
267 stored at -80°C and thawed immediately before use.

268 For lentivirus production, 293T cells were transfected with psPAX2, pMD2.G and

269 pCDH-gB-flag-puro/pCDH-gp350-flag-puro/pCDH-gLgH-flag-puro at a mass ratio of  
270 3:2:5 using PEI. The supernatant was collected 48 h after transfection, filtered through  
271 0.45 µm filters and then mixed with 5 × PEG8000 NaCl solution at 4°C overnight.  
272 Lentivirus was collected by centrifugation at 4,000 × g at 4°C for 1 h and resuspended in  
273 RPMI 1640. The lentivirus was stored at -80°C and thawed immediately before use.

274

### 275 **Neutralization assays**

276 All sera used in this assay were treated at 56°C for 45 min to inactivate the  
277 complement, and no extra complement was added. For B cell neutralization, 2-fold  
278 serially diluted antibodies (starting from 100 µg/ml) or 2-fold serially diluted human  
279 sera (starting from 1:10 dilution) were incubated with 20 µl (2,000 green Raji units  
280 (GRUs)) of CNE2-EBV-GFP for 2 h at 37°C. Subsequently, the mixtures were added to  
281  $1 \times 10^4$  EBV-negative Akata B cells in 96-well plates and incubated for 3 h at 37°C. For  
282 epithelial cell neutralization, 2-fold serially diluted purified antibodies (starting from  
283 100 µg/ml) were mixed and incubated with 50 µl (2,500 GRUs) Akata-EBV-GFP for 2  
284 h at room temperature. The mixture was added to  $5 \times 10^3$  HNE1 epithelial cells/well in  
285 96-well plates and then incubated for 3 h at 37°C.

286 Then, the free EBV viruses in the culture medium in both assays were removed by  
287 washing with PBS once. After the cells were further cultured in fresh RPMI 1640 with  
288 10% FBS for 48 h and washed once with PBS, the infection rate was determined by  
289 detecting and analyzing the numbers of GFP-positive cells using CytoFLEX (Beckman  
290 Coulter) and FlowJo software X 10.0.7 (Tree Star). EBV-negative Akata B cells and  
291 HNE1 epithelial cells were used as negative controls in the B cell and epithelial cell  
292 neutralization assays, respectively. EBV-negative Akata B cells and HNE1 epithelial  
293 cells incubated with EBV without antibodies were used as positive controls in the B cell  
294 and epithelial cell neutralization assay.

295 The neutralizing efficiency of antibodies was calculated using the following formula:  
296 neutralization % = 1 - the percent of infected cells with serum or mAb/the percent of  
297 infected cells without serum or mAb × 100%. The inhibition profiles were fitted to a  
298 sigmoid trend to generate the IC<sub>50</sub> value.

299 The reduction in the neutralizing titer of the human serum after the depletion of  
300 gp350-, gB- or gHgL-specific serum antibodies was calculated by the formula  
301  $(1 - \text{IC}_{50\text{-depleted}} / \text{IC}_{50\text{-before}}) \times 100\%$ , where  $\text{IC}_{50\text{-depleted}}$  is the neutralizing titer of the  
302 serum depleted by specific glycoprotein-expressed 293T cells, and  $\text{IC}_{50\text{-before}}$  is the  
303 neutralizing titer of the serum before depletion.

304

### 305 **Surface plasmon resonance (SPR)**

306 SPR-based antibody affinity (KD value) was determined using Biacore 8000  
307 (Cytiva). The sensor chip NTA was used to immobilize gB protein by metal  
308 chelation. 0.5 mM of  $\text{NiCl}_2$  was loaded for ligand capture. EBV gB was loaded at a 2  
309  $\mu\text{g/ml}$  concentration for 60 s. The serially diluted 3A3, 3A5, or AMMO5 Fabs were  
310 injected at 30  $\mu\text{L/min}$  for 200 s (association phase) and then dissociated at 30  
311  $\mu\text{L/min}$  for 400 s (dissociation phase). The chip was regenerated by one injection of  
312 350 mM EDTA after each run. The results were analyzed by BIAcore Insight  
313 Evaluation software (Cytiva). The curve fitting was performed using a 1:1  
314 interaction model and  $\chi^2$  values less than 10% of the  $R_{\text{max}}$  value were acceptable.

315

### 316 **Analytical ultracentrifugation (AUC)**

317 Sedimentation velocity was used to monitor the binding of the antigen and mAb in  
318 PBS. The experiments were conducted at 20°C on a Beckman XL-A analytical  
319 ultracentrifuge equipped with absorbance optics and an An60-Ti rotor (Beckman  
320 Coulter). All samples were diluted to ~ 1 OD at 280 nm in PBS buffer in a 1.2 cm light  
321 path. The speed was set to 36,000 rpm for gB-WT or gB mutants, 38,000 rpm for 3A3  
322 Fab or 3A5 Fab, and 30,000 rpm for immune complexes. gB-WT or its mutants and  
323 3A3 Fab or 3A5 Fab were mixed at a molar ratio of 1:5 and incubated for 1 h at 37 °C  
324 to generate immune complexes. The sedimentation coefficient was obtained using the  
325 c(s) method with Sedfit software.

326

### 327 **Virus-free epithelial cell fusion assay**

328 HEK-293T cells were seeded in 10 cm dishes in DMEM with 10% FBS at a density

329 of  $2 \times 10^6$  cells/dish. Upon reaching 80% confluence, effector HEK-293T cells were  
330 transfected with 2.5  $\mu$ g each of pCAGGS-gB or pCAGGS-gB-mutants, pCAGGS-gH,  
331 pCAGGS-gL, and pCAGT7 polymerase that expresses T7 DNA polymerase, while  
332 recipient HEK-293T cells were transfected with 10  $\mu$ g of pT7EMCLuc, which expresses  
333 the luciferase reporter gene under the control of the T7 promoter. Twenty-four hours  
334 after transfection,  $2 \times 10^5$  effector cells were trypsinized and incubated with 20  $\mu$ g of  
335 3A3, 3A5, 3A3+3A5, and 1E12 at 37°C for 30 min. Then, the target cells were mixed  
336 and co-cultured with  $2 \times 10^5$  recipient cells in a 24-well plate for another 24 h at 37°C in  
337 DMEM with 10% FBS. The cocultured cells were lysed and luciferase activity was  
338 quantified using a Dual-Glo luciferase assay following the manufacturer's instructions  
339 (Promega).

340

#### 341 **Quantification of the cell surface and total expression of gB mutants**

342 HEK-293T cells were seeded in 10 cm dishes in DMEM with 10% FBS at a density of  
343  $2 \times 10^6$  cells/dish. Upon reaching 80% confluence, the cells were transfected with 2.5  $\mu$ g  
344 of gB mutants, including H352A, E356A, D360A, H540A, T567A, H610A, T613A, and  
345 gB-WT. Cells were collected at 24 h after transfection and incubated with 100  $\mu$ g/ml  
346 3A3 or 3A5 at 4°C for 30 min. After washing with PBS, a 1:500 diluted goat  
347 anti-rabbit IgG Alexa Fluor 647 antibody (Invitrogen) was added and incubated at 4°C  
348 for 30 min to detect cell surface expression. Total expression of gB mutants was  
349 determined using the same protocol, except that cells were permeabilized according to  
350 the eBioscience™ Intracellular Fixation & Permeabilization Buffer Set (Invitrogen)  
351 kit before adding the primary antibodies. The assay was performed using CytoFLEX  
352 (Beckman Coulter), and AF647 positive cells were analyzed using FlowJo software X  
353 10.0.7 (Tree Star).

354

#### 355 **Cell surface binding assay**

356 gB or BSA (Sigma) was labeled with AF488 NHS Ester (Lumiprobe) at a molar ratio of  
357 1:8 (gB: AF488 NHS Ester). NRP1 was biotinylated at a 1:1 ratio (biotin: NRP1) using  
358 a biotinylation kit (Genemore) according to the manufacturer's instructions.

359 Biotinylated proteins were conjugated with streptavidin-phycoerythrin (SA-PE;  
360 eBioscience) at a 4:1 ratio of biotin to streptavidin.

361 BSA-AF488 or gB-AF488 (2.5  $\mu$ g) was mixed with 35  $\mu$ g of 3A3, 3A5, AMMO5, or  
362 1E12 in 50  $\mu$ l of PBS. The mixtures were added to individual 96-well plates and then  
363 incubated at room temperature for 1.5 h. AGS and HK1 epithelial cells were  
364 trypsinized, washed with PBS, and incubated in a complete medium at 37°C for 30 min  
365 for a recovery. Then, recovered AGS and HK1 epithelial cells, and Akata and Raji B  
366 cells were centrifuged at 450  $\times$  g for 5 min and resuspended in ice-cold 0.5% BSA  
367 (Sigma) in PBS. Then, 100  $\mu$ l of  $1 \times 10^5$  cell suspension was mixed with BSA-AF488  
368 and gB-AF488 with/without antibodies and incubated on ice for 1 h. Cells were  
369 collected by centrifugation at 450  $\times$  g for 5 min, washed with 0.5% BSA, resuspended  
370 and fixed in 4% paraformaldehyde. The assay was performed using CytoFLEX  
371 (Beckman Coulter), and AF647-positive cells were analyzed using FlowJo software X  
372 10.0.7 (Tree Star).

373 Twenty-four hours after transfection with gB-WT or gB mutants, 293T cells were  
374 trypsinized, washed with PBS, and incubated in a complete medium at 37°C for 30 min.  
375 3A3 (35  $\mu$ g) was mixed with  $1 \times 10^5$  cells and then incubated at 37°C for 1.5 h.  
376 SA-PE-NRP1 or SA-PE (2.5  $\mu$ g) in 50  $\mu$ l of PBS was added to each well and incubated  
377 on ice for 1 h. The following steps were the same as described above.

378

### 379 **EBV infection in humanized mice**

380 All animal experiments were performed under protocols approved by the Sun  
381 Yat-sen University Cancer Center Animal Care and Use Committee. Humanized  
382 mice were established by an i.v. injection of human cord blood CD34<sup>+</sup> hematopoietic  
383 stem cells into 4-week-old NOD.Cg-Prkdc<sup>em1IDMO</sup>Il2rg<sup>em2IDMO</sup> (NOD-Prkdc<sup>null</sup>  
384 *IL2R $\gamma$* <sup>null</sup>, NPI<sup>®</sup>) mice (BEIJING IDMO Co., Ltd) 48 hrs post a single dose of  
385 Busulfan via i.p. injection at 20 mg/kg body weight. Each mouse was i.p. injected  
386 with 400  $\mu$ g (~20 mg/kg) experimental or control antibodies 8 weeks post CD34<sup>+</sup> stem  
387 cell transfer. After 24 h, all the mice received a dose of Akata-EBV-GFP (25,000 GRUs)  
388 via i.v. injection. In the following four weeks, the mice received a dose of 400

389  $\mu\text{g}/\text{mouse}$  ( $\sim 20 \text{ mg}/\text{kg}$ ) of antibodies weekly. Blood samples were collected, and  
390 bodyweights were recorded weekly. The mice were euthanized at the 8<sup>th</sup>-week  
391 post-challenge or earlier if the mice had a bodyweight loss  $\geq 20\%$ .

392

### 393 **Detection of EBV DNA in blood and tissues**

394 DNA was extracted from the peripheral blood (50  $\mu\text{l}$ ) or tissues of mice using  
395 commercial DNA extraction kits (Omega). Then EBV copy numbers were detected by  
396 real-time polymerase chain reaction (RT-PCR) using primers (F:  
397 5'-GGTCACAATCTCCACGCTGA-3'; R: 5'-CAACGAGGCTGACCTGATCC-3') to  
398 amplify a fragment of BALF5. The copy numbers of EBV were quantified using a  
399 standard curve plotted with a serially diluted plasmid of pUC19-BALF5.

400

### 401 **H&E staining, IHC, and in situ hybridization**

402 Tissue samples were fixed in 10% formalin and embedded in paraffin. The treated  
403 samples were stained with hematoxylin and eosin (H&E). EBERs were detected by in  
404 situ hybridizations using an EBER detection kit (ZSGB-BIO) according to the  
405 manufacturer's instructions. Immunostaining of human B cells was performed using an  
406 hCD20 antibody (Abcam) at a 1:200 dilution.

407

### 408 **Flow cytometry assay of human cells in humanized mice**

409 The peripheral blood of mice was treated with 1 ml of red blood cell lysis buffer  
410 (BioLegend) at room temperature for 10 min. Then, the cells were centrifuged at 300  
411  $\times g$ , washed twice with PBS, resuspended in PBS, and stained with antibodies  
412 including anti-human CD45-APC/Cy7, CD19-APC, CD3-FITC, CD4-pacific blue,  
413 CD8-PC5.5, CD69-PC7, CD137-APC, CD38-BV650, CD24-PC5.5 and anti-mouse  
414 CD45-BV510 (Biolegend) for 30 min at 4°C. The assays were performed with a  
415 CytoFLEX (Beckman Coulter), and the data were analyzed using FlowJo software X  
416 10.0.7 (Tree Star).

417

### 418 **Rabbit immunization**

419 New Zealand white rabbits (n=3) were immunized subcutaneously (s.c.) with soluble  
420 gB at a dose of 500 µg three times at 2-week intervals. Blood samples were collected  
421 two weeks after the third injection, and the serum titers of anti-gB antibodies were  
422 detected by ELISA. PBMCs were collected for B cell sorting.

423

#### 424 **Statistical analysis**

425 All statistical analyses were conducted with GraphPad Prism version 8. Statistical  
426 tests, n and *P* values are indicated in figure legends.



427 **References**

- 428 1. M. Backovic, R. Longnecker, T. S. Jardetzky, Structure of a trimeric variant of  
429 the Epstein-Barr virus glycoprotein B. *Proceedings of the National Academy*  
430 *of Sciences of the United States of America* **106**, 2880-2885 (2009).
- 431 2. H. Chen *et al.*, Evaluation of a semi-quantitative ELISA for IgA antibody  
432 against Epstein-Barr virus capsid antigen in the serological diagnosis of  
433 nasopharyngeal carcinoma. *International journal of infectious diseases : IJID :*  
434 *official publication of the International Society for Infectious Diseases* **25**,  
435 110-115 (2014).
- 436 3. R. Gao *et al.*, Evaluation of seven recombinant VCA-IgA ELISA kits for the  
437 diagnosis of nasopharyngeal carcinoma in China: a case-control trial. *BMJ*  
438 *open* **7**, e013211 (2017).
- 439 4. N. Obel, M. Hoier-Madsen, H. Kangro, Serological and clinical findings in  
440 patients with serological evidence of reactivated Epstein-Barr virus infection.  
441 *APMIS* **104**, 424-428 (1996).
- 442 5. D. N. Mastronarde, Automated electron microscope tomography using robust  
443 prediction of specimen movements. *J Struct Biol* **152**, 36-51 (2005).
- 444 6. S. Q. Zheng *et al.*, MotionCor2: anisotropic correction of beam-induced  
445 motion for improved cryo-electron microscopy. *Nature methods* **14**, 331  
446 (2017).
- 447 7. K. Zhang, Gctf: Real-time CTF determination and correction. *Journal of*  
448 *structural biology* **193**, 1-12 (2016).
- 449 8. A. Punjani, J. L. Rubinstein, D. J. Fleet, M. A. Brubaker, cryoSPARC:  
450 algorithms for rapid unsupervised cryo-EM structure determination. *Nat*  
451 *Methods* **14**, 290-296 (2017).
- 452 9. D. Kimanius, B. O. Forsberg, S. H. Scheres, E. Lindahl, Accelerated cryo-EM  
453 structure determination with parallelisation using GPUs in RELION-2. *Elife* **5**,  
454 e18722 (2016).
- 455 10. T. Grant, A. Rohou, N. Grigorieff, cisTEM, user-friendly software for  
456 single-particle image processing. *eLife* **7** (2018).
- 457 11. S. H. Scheres, S. Chen, Prevention of overfitting in cryo-EM structure  
458 determination. *Nat Methods* **9**, 853-854 (2012).
- 459 12. A. Kucukelbir, F. J. Sigworth, H. D. Tagare, Quantifying the local resolution  
460 of cryo-EM density maps. *Nature methods* **11**, 63 (2014).
- 461 13. E. F. Pettersen *et al.*, UCSF Chimera—a visualization system for exploratory  
462 research and analysis. *Journal of computational chemistry* **25**, 1605-1612  
463 (2004).
- 464 14. P. Emsley, K. Cowtan, Coot: model-building tools for molecular graphics.  
465 *Acta Crystallographica Section D: Biological Crystallography* **60**, 2126-2132  
466 (2004).
- 467 15. P. D. Adams *et al.*, PHENIX: a comprehensive Python-based system for  
468 macromolecular structure solution. *Acta Crystallographica Section D:*  
469 *Biological Crystallography* **66**, 213-221 (2010).
- 470 16. V. B. Chen *et al.*, MolProbity: all-atom structure validation for

471 macromolecular crystallography. *Acta Crystallographica Section D:*  
472 *Biological Crystallography* **66**, 12-21 (2010).  
473 17. N. Collaborative Computational Project, The CCP4 suite: programs for protein  
474 crystallography. *Acta Crystallogr D Biol Crystallogr* **50**, 760-763 (1994).  
475

476 **Supplementary Figures**

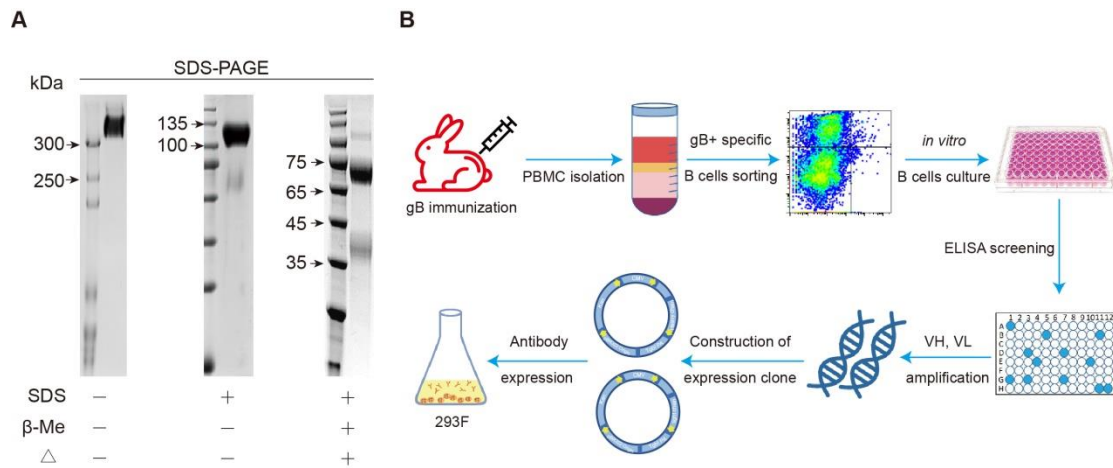

477

478 **Figure S1. Characteristics of the recombinant gB ect-domain and the screening**  
 479 **strategy for gB-specific antibodies**

480 (A) Characteristics of recombinant gB ect-domain (ect-gB) expressed by 293F cells  
 481 using SDS-PAGE. Left lane: ect-gB was treated under non-reducing conditions;  
 482 middle lane: ect-gB was treated only with 0.1% SDS; right lane: ect-gB was treated  
 483 under reducing conditions. Δ denotes heating at 100 °C for 5 min. Two bands with  
 484 molecular weights of ~ 70 kDa and ~ 40 kDa were observed in the reducing  
 485 SDS-PAGE.

486 (B) Workflow of antibody isolation from antiserum collected from gB-immunized  
 487 rabbits. Briefly, the rabbit was immunized with purified gB protein. FACS was used  
 488 to sort the gB-specific B cells from the PBMCs of immunized rabbits. The sorted B  
 489 cells were cultured *in vitro*, and the medium was measured for its reactivity against  
 490 gB by ELISA. Then, the variable fragments of the paired heavy (VH) and light (VL)  
 491 chains were amplified using the positive B cells, and the recombinant plasmids were  
 492 reconstructed. The plasmids were transfected into 293F cells for antibody expression.

493

494

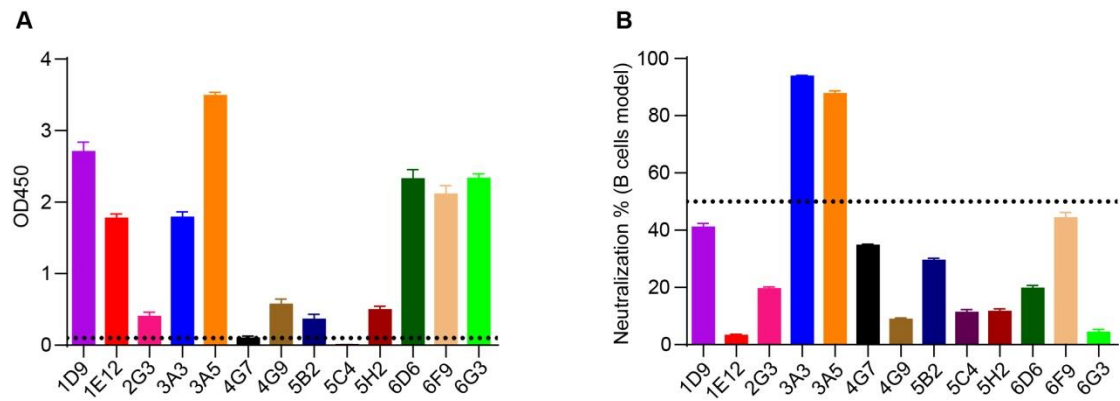

495

496 **Figure S2. Binding and neutralizing abilities of a panel of monoclonal antibodies**  
 497 **raised by ect-gB.**

498 (A) Binding activities of mAbs detected by gB-based ELISA. The cutoff value was  
 499 set as OD450=0.1.

500 (B) Neutralizing abilities of mAbs evaluated by a B cell (Akata cell) infection model.  
 501 The cutoff value was set as neutralization%=50%.

502 Data are shown as the mean of two independent replicates  $\pm$  SEM

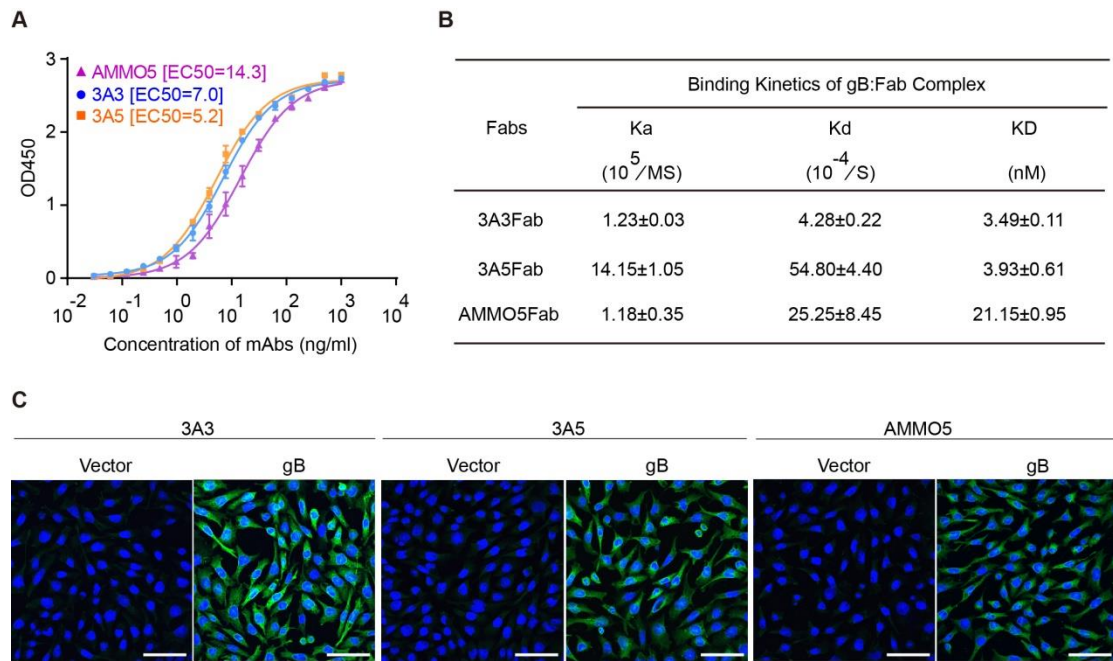

503

504 **Figure S3. Evaluation of the binding and neutralizing abilities of 3A3 and 3A5.**

505 (A) The binding activities of the three mAbs of 3A3, 3A5 and AMMO5 to gB were  
506 tested by ELISA, and the EC<sub>50</sub> values were calculated by sigmoid trend fitting.

507 Curves for 3A3, 3A5, and AMMO5 were colored blue, yellow and purple,  
508 respectively. Data are shown as the mean of two independent replicates ± SEM.

509 (B) The affinity constants of the interaction between gB coupled to the chip and the  
510 Fabs of 3A3, 3A5 or AMMO5 were measured by SPR in Biacore8000. The values are  
511 shown as the mean of two independent replicates ± SD.

512 (C) The binding of 3A3, 3A5, and AMMO5 to endogenously-expressed gB in COS7  
513 fibroblast cells. Cells were stained with mAbs of 3A3, 3A5 and AMMO5, respectively,  
514 followed by goat anti-rabbit IgG AlexaFluor 488 or goat anti-human IgG AlexaFluor  
515 488. A scale bar of 50 μm is shown.

516

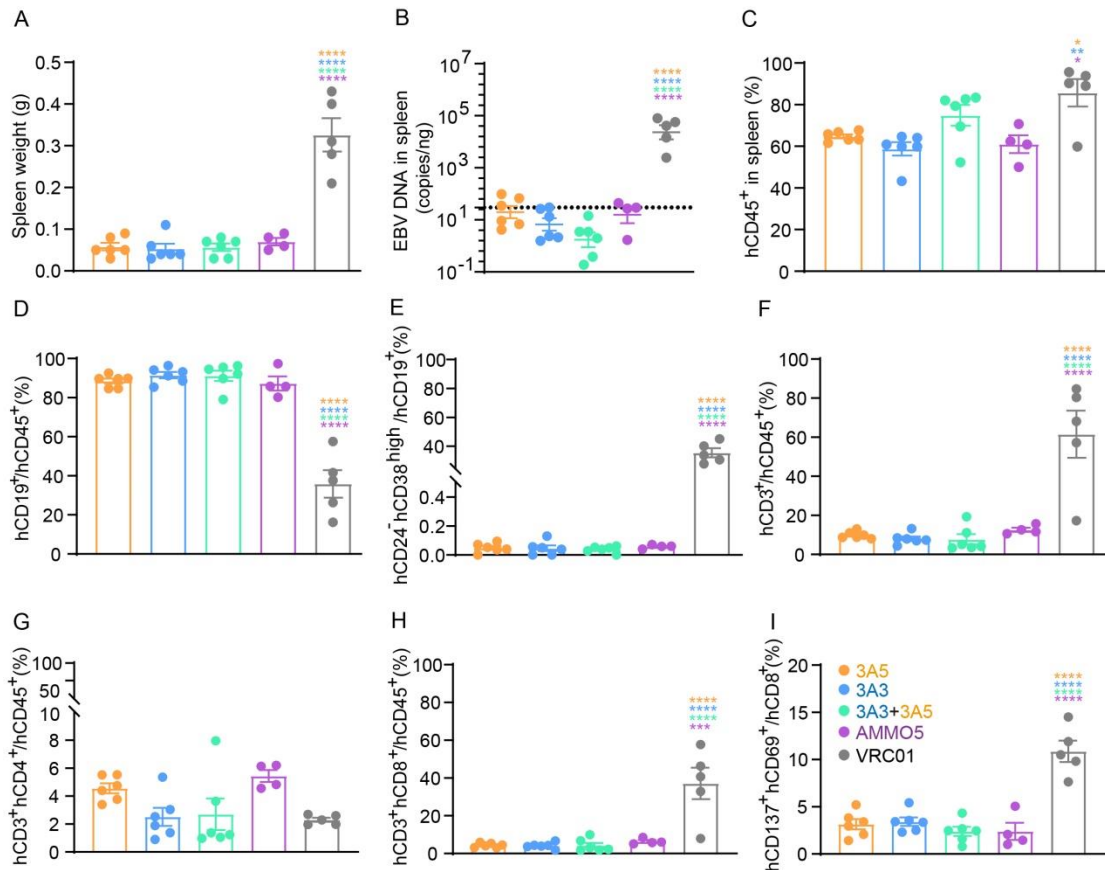

517

518 **Figure S4. 3A3 and 3A5 conferred protection to humanized mice from**  
 519 **EBV-induced LPD.**

520 (A and B) Spleen weight (A) and EBV DNA copies in the spleens (B) were quantified  
 521 at the experimental endpoint of each mouse.

522 (C-I) The percent changes for hCD45<sup>+</sup> (C), hCD19<sup>+</sup> (D), hCD19<sup>+</sup>CD24<sup>+</sup>CD38<sup>high</sup> (E),  
 523 hCD3<sup>+</sup> (F), hCD4<sup>+</sup> (G), hCD8<sup>+</sup> (H) and hCD8<sup>+</sup>CD137<sup>+</sup>CD69<sup>+</sup> (I) cells in the spleen

524 over the experimental period. These data were collected and analyzed at the  
 525 experimental endpoint of each mouse. Data points represent individual mice, and the  
 526 mean error bars are shown as SE. For the AMMO5 group, two mice naturally died,  
 527 and only four data points were collected. For the VRC01 group, one mouse naturally  
 528 died, and five data points from five mice were collected. Among the five mice, four  
 529 mice were euthanized because of >20% bodyweight loss, and only one survived to the  
 530 experimental endpoint.

531 Data schematics for 3A3, 3A5, 3A3+3A5, AMMO5, and VRC01 were colored blue,  
 532 yellow, green, purple, and black.

533 Statistical analyses were performed using one-way ANOVA. The color of the asterisks

534 (\* $P \leq 0.0332$ , \*\* $P \leq 0.0021$ , \*\*\*\* $P \leq 0.0001$ ) denotes the group with which there is a  
535 significant difference from the VCR01-treated group, determined by a Sidak multiple  
536 comparisons test.

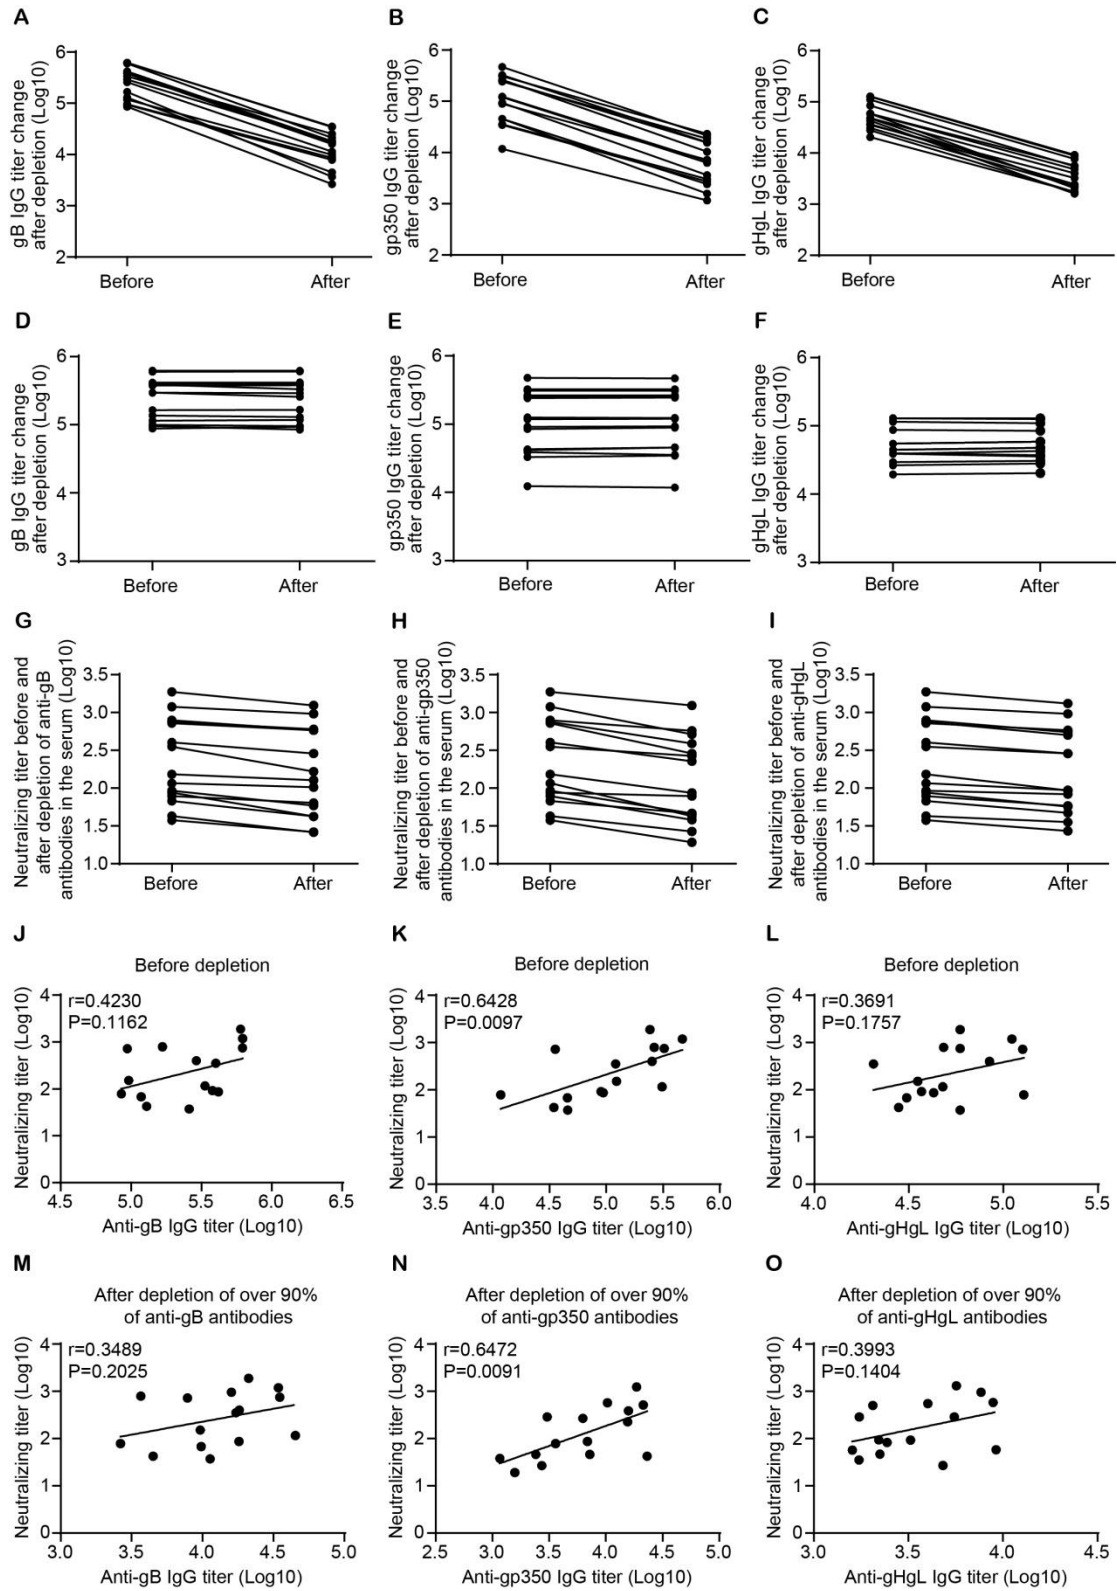

537

538 **Figure S5. Evaluation of total IgG antibody titers against gB, gHgL, and gp350**  
 539 **in human sera and neutralizing titers using the B cell infection model.**

540 (A-C) The serum IgG titers against gB (A), gp350 (B), and gHgL (C) before and after  
 541 15 rounds of depletion with 293T cells overexpressing gB, gp350, and gHgL,



542 respectively. (D-F) The serum IgG titers against gB (D), gp350 (E), and gHgL (F)  
543 before and after the mock depletion assays using 293T cells transfected with the  
544 empty vector. (G-H) The neutralizing titers of each serum before and after specific  
545 depletion of over 90% of anti-gB (G), gp350 (H), and gHgL (I) antibodies,  
546 respectively. The neutralizing titers before and after depletion were measured by the B  
547 cell infection model. (J-O) The correlations between IgG titers against each  
548 glycoprotein indicated and the neutralizing titers before (J-L) and after (M-O) the  
549 specific antibody depletion. The correlation coefficients ( $r$ ) between the IgG titers and  
550 neutralizing titers were determined by the Pearson correlation coefficient.  $P$  values  
551 from the two-tailed significance tests smaller than 0.05 are statistically significant.  
552

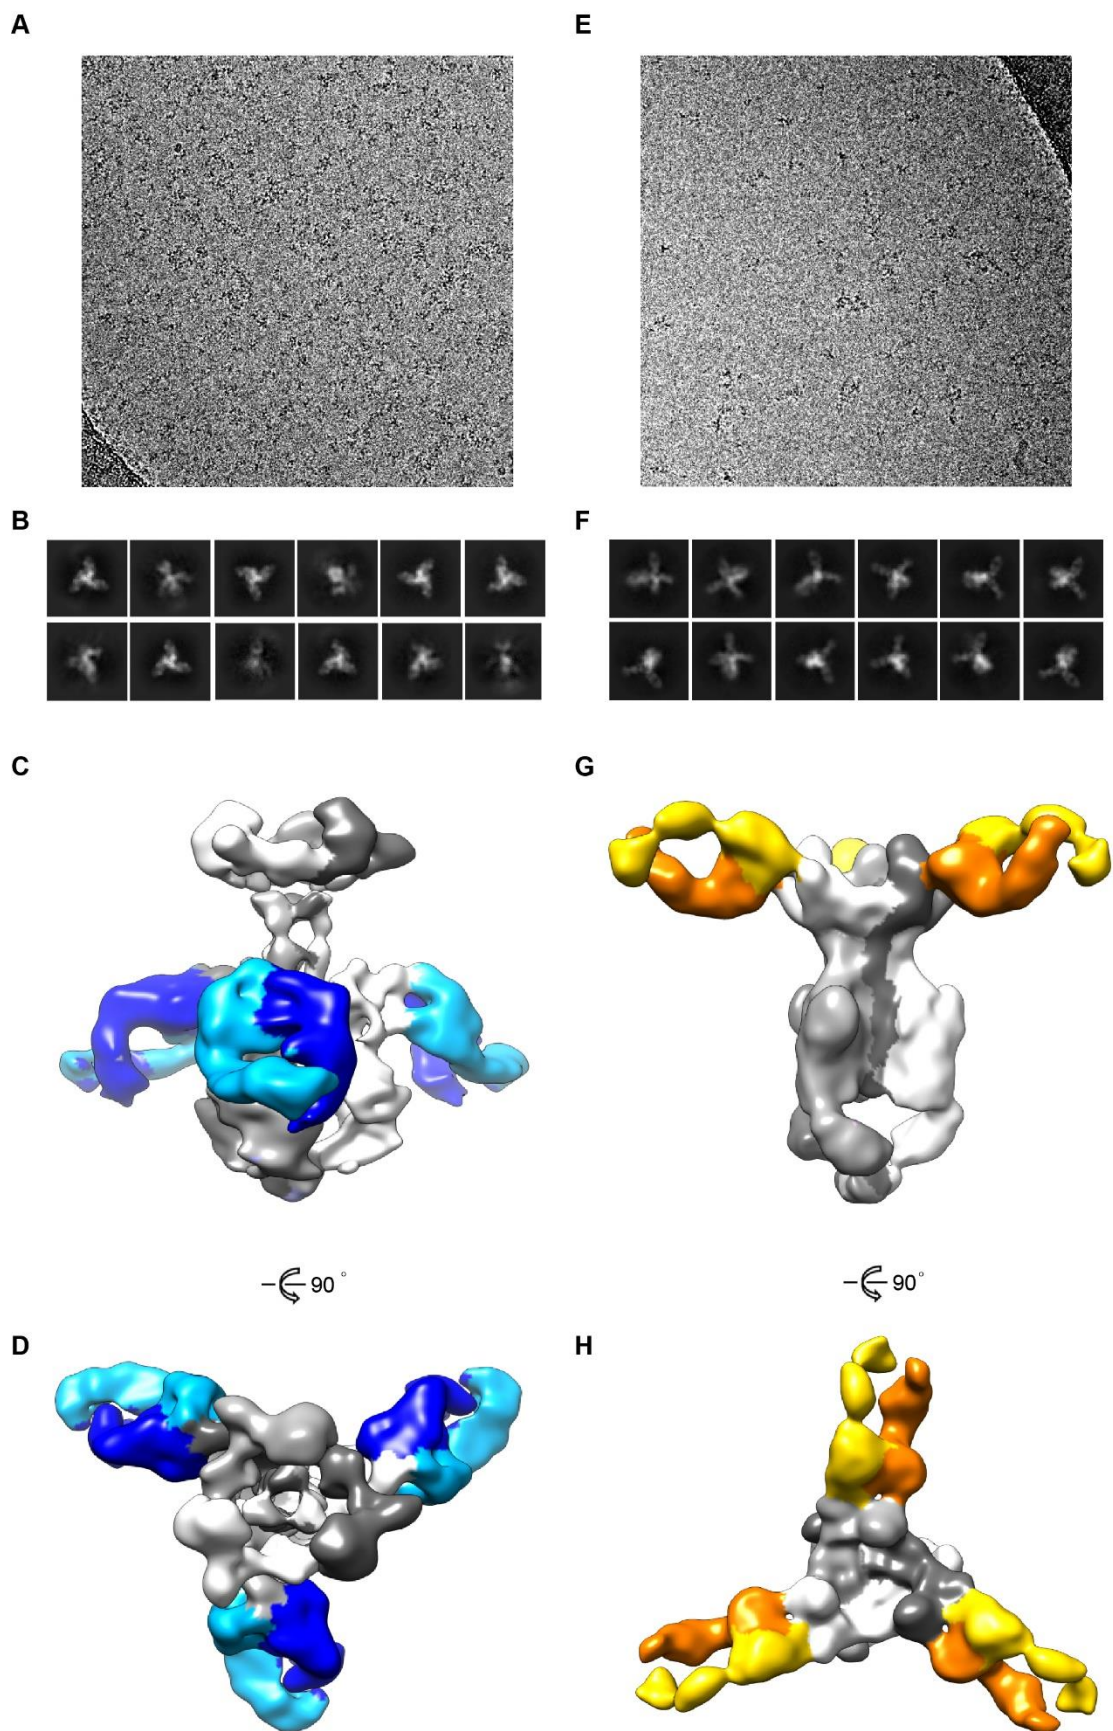

553

554 **Figure S6. Cryo-EM reconstructions of gB:3A3Fab and gB:3A5Fab.**

555 (A and E) Motion corrected micrographs of gB:3A3Fab (A) and gB:3A5Fab (E)

556 complexes, scale bar=50 nm.  
557 (B and F) Representative 2D class averages of gB:3A3Fab (B) and gB:3A5Fab (F)  
558 were shown.  
559 (C and D) The density map of gB:3A3Fab was shown in the side view (C) and top  
560 view (D). The gB trimer, the heavy chain, and the light chain of 3A3Fab were colored  
561 gray, blue, and cyan, respectively.  
562 (G and H) The density map of gB:3A5Fab was shown in the side view (G) and top  
563 view (H). The heavy chain and light chain of 3A5Fab were colored orange and yellow,  
564 respectively.

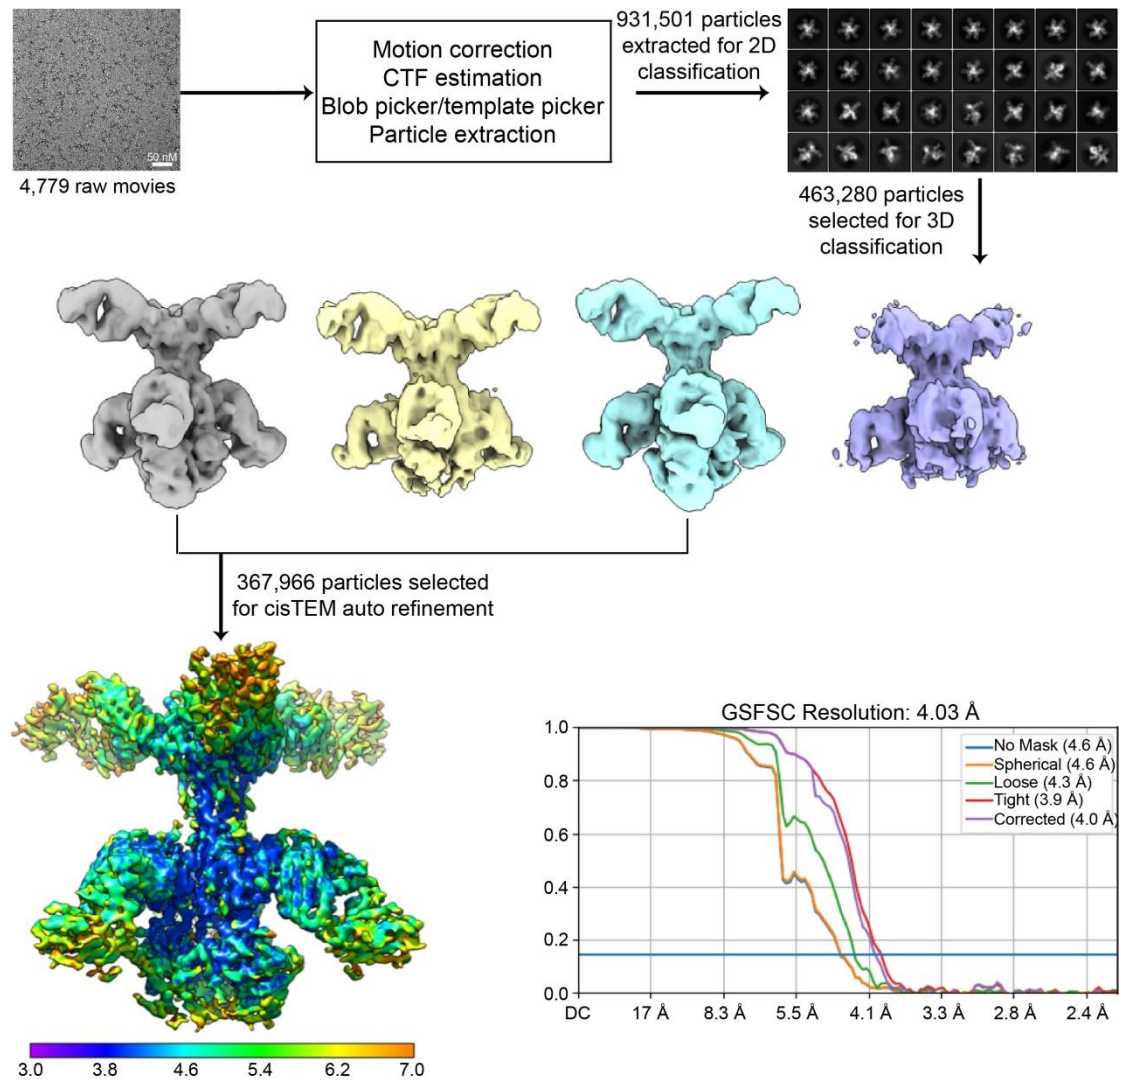

565

566 **Figure S7. Cryo-EM reconstruction of gB:3A3Fab:3A5Fab.**

567 Cryo-EM image processing flowchart for the immune complex of

568 gB:3A3Fab:3A5Fab. Representative results of the cryo-EM micrograph, 2D

569 classification, 3D classification, auto refinement, local resolution map, and FSC

570 curves are shown. Scale bar: 50nm.

571

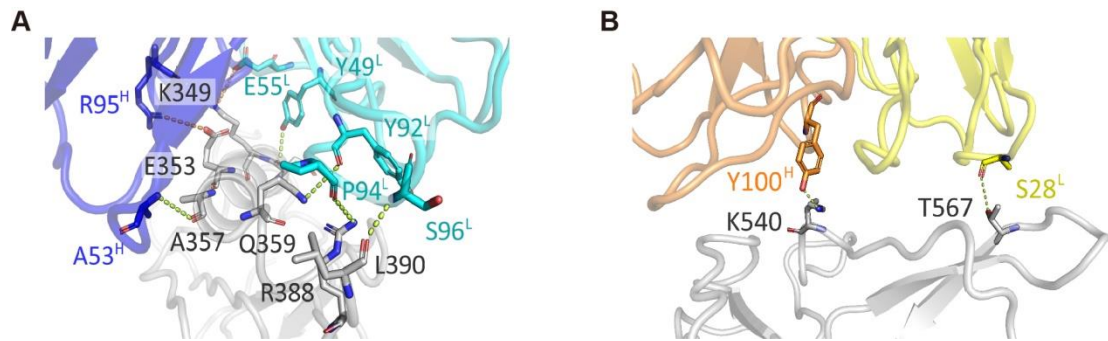

572

573 **Figure S8. The detailed interaction at the interface of gB and 3A3 or 3A5.**

574 (A) The residues involved in the 3A3 interactions were mapped on the gB surface  
 575 including K349, E353, E356, A357, Q359, D360, R388, and L390. The key residues  
 576 localized at the VH and VL chains of 3A3 are labeled, including Y49<sup>L</sup>, E55<sup>L</sup>, Y92<sup>L</sup>,  
 577 P94<sup>L</sup>, S96<sup>L</sup>, A53<sup>H</sup> and R95<sup>H</sup>.

578 (B) The key residues involved in the 3A5 interactions were mapped on the gB surface  
 579 including K540 and T567. The key residues localized at the VH and VL chains of 3A5  
 580 are labeled including S28<sup>L</sup> and Y100<sup>H</sup>. The involved residues are displayed as sticks.

581

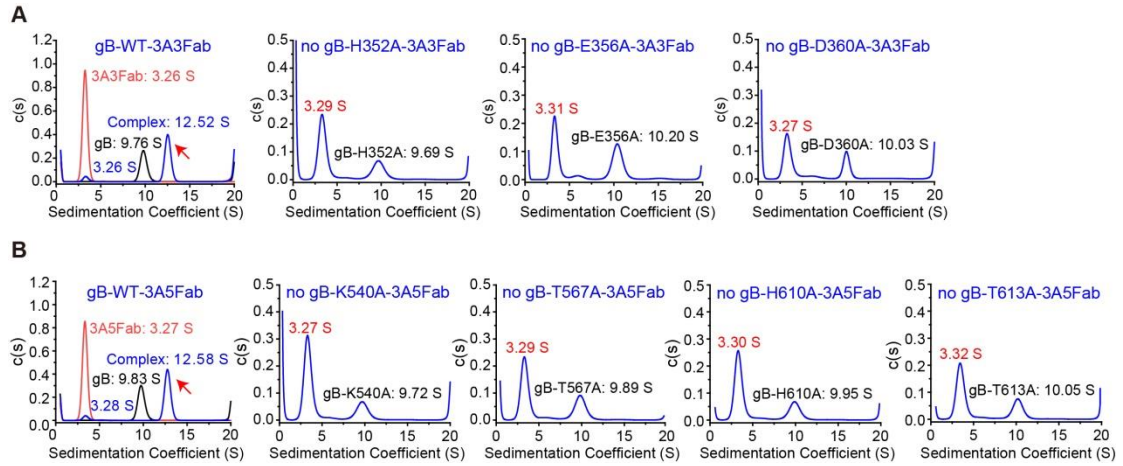

582

583 **Figure S9. Identification of the key residues referring to the interface of 3A3 or**  
 584 **3A5 and gB.**

585 Sedimentation velocities (SVs) were detected for the interaction of mAbs 3A3 (A)  
 586 and 3A5 (B) with mutant and wild-type gB. The c(s) profiles of 3A3Fab and 3A5Fab,  
 587 gB and the mutants, and the gB-Fab mixtures were denoted as red, black, and blue.

588

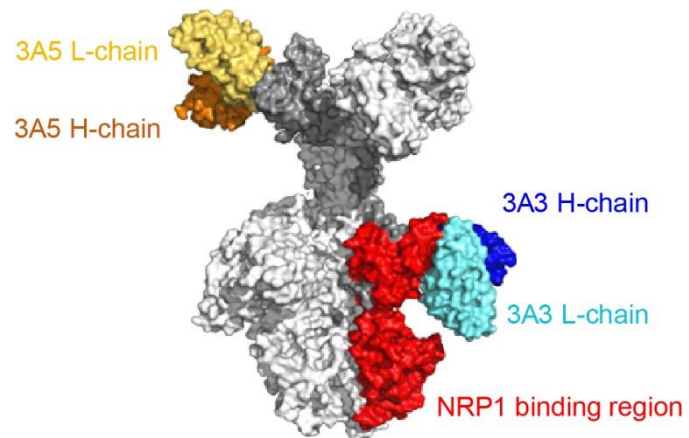

589

590 **Fig S10. Presentation of the binding region for NRP1, 3A3, and 3A5 on the gB**

591 **surface.** The binding regions of NRP1, 3A3 and 3A5 were colored red, blue, and

592 yellow, respectively.

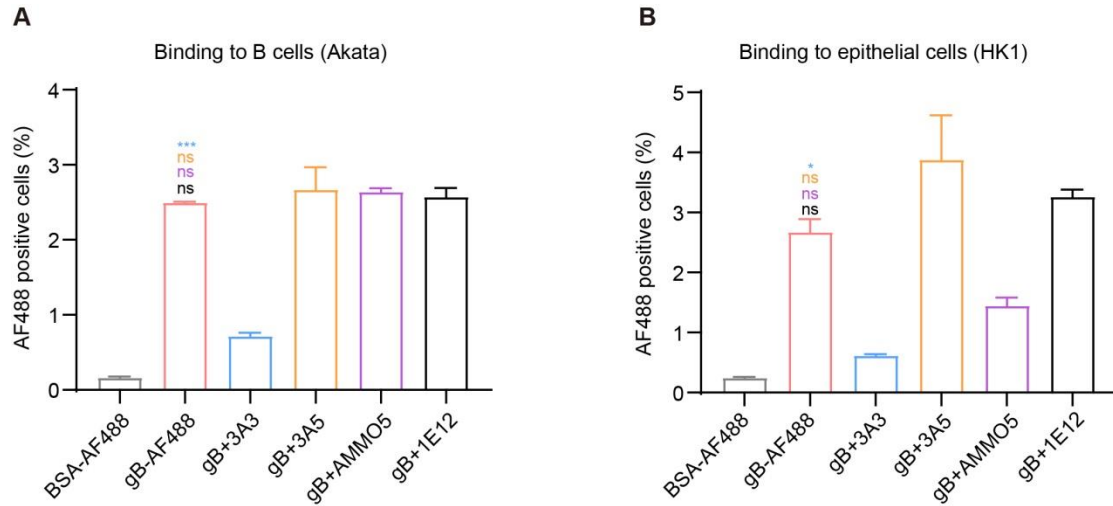

593

594 **Figure S11. The blocking potential of different antibodies against the binding of**  
 595 **gB to Akata cells (A) and HK1 cells (B).**

596 Blocking effectivity of gB binding to Akata cells (A) and HK1 cells (B), respectively,  
 597 by gB-specific mAbs 3A3, 3A5, AMMO5 and 1E12. BSA-AF488 was used as a  
 598 negative control. gB-AF488 was used as a positive control. The results were  
 599 represented as mean  $\pm$  SEM.

600



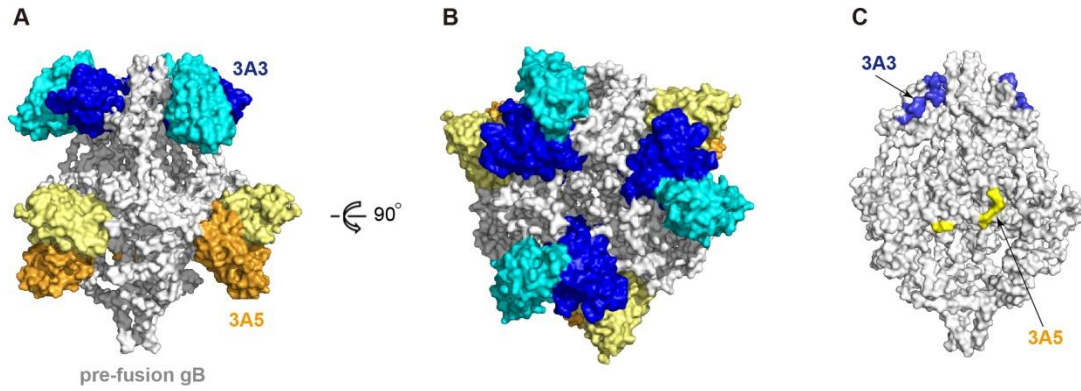

601

pre-fusion gB

602 **Figure S12. Presentation of the epitopes of 3A3 and 3A5 on the modeled**  
 603 **pre-fusion gB surface.**

604 The pre-gB was modeled using the homology template of HCMV pre-gB (PDB no:  
 605 7KDP). (A and B) The binding models of 3A3 and 3A5 to pre-fusion gB were shown  
 606 (A, side view; B, top view). 3A3 in blue, 3A5 in yellow, and pre-gB in grey,  
 607 respectively. (C) The epitopes recognized by 3A3 and 3A5 were indicated on the  
 608 surface of pre-fusion gB. The epitopes recognized by 3A3 and 3A5 were labeled with  
 609 blue and yellow, respectively.

610

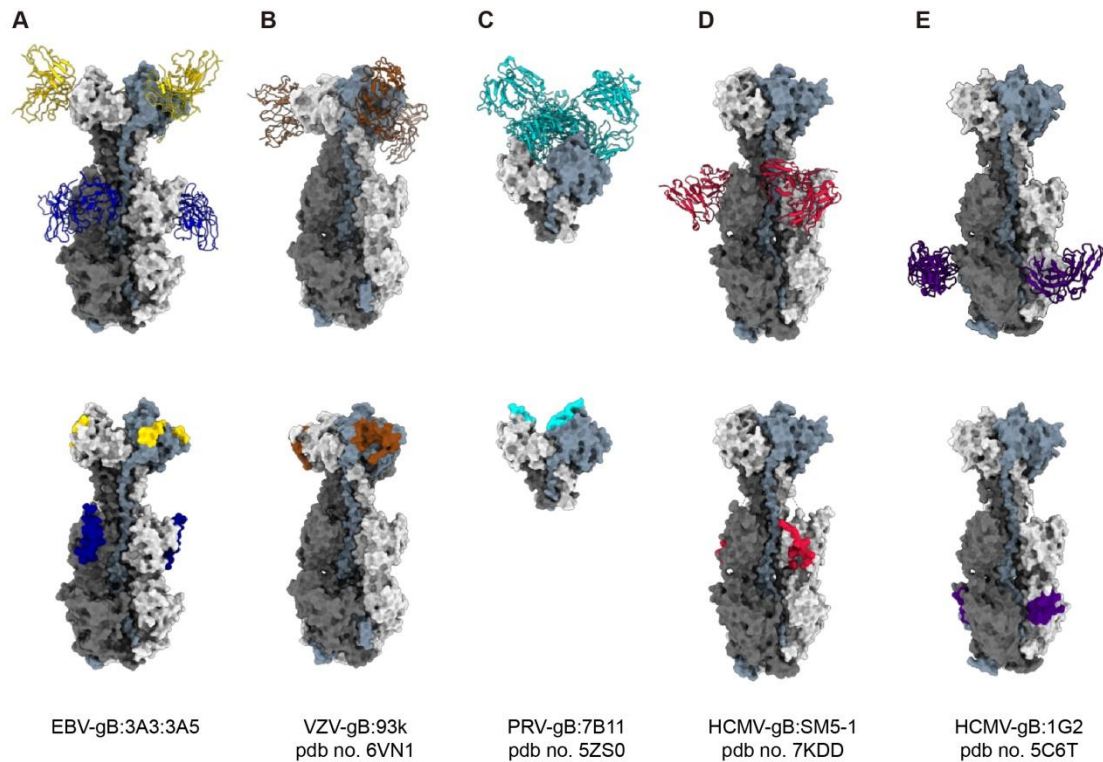

612 **Figure S13. Comparison of the binding mode (upper panels) and binding sites**  
 613 **(lower panels) of the representative anti-gB neutralizing antibodies (nAbs).**

614 3A3/3A5 involved in this study (A), VZV-gB specific nAb 93k (B), PRV-gB specific  
 615 nAb 7B11 (C), HCMV-gB specific nAbs SM5-1(D) and 1G2 (E) were shown. The gB  
 616 timer was shown as surface representation and colored gray, dark gray and dim gray  
 617 for each monomer. 3A3, 3A5, 93k, 7B11, SM5-1 and 1G2 were shown as sticks and  
 618 colored yellow, blue, brown, cyan, red, and purple. The footprints of each nAb were  
 619 shown in the lower panels and colored accordingly.

620

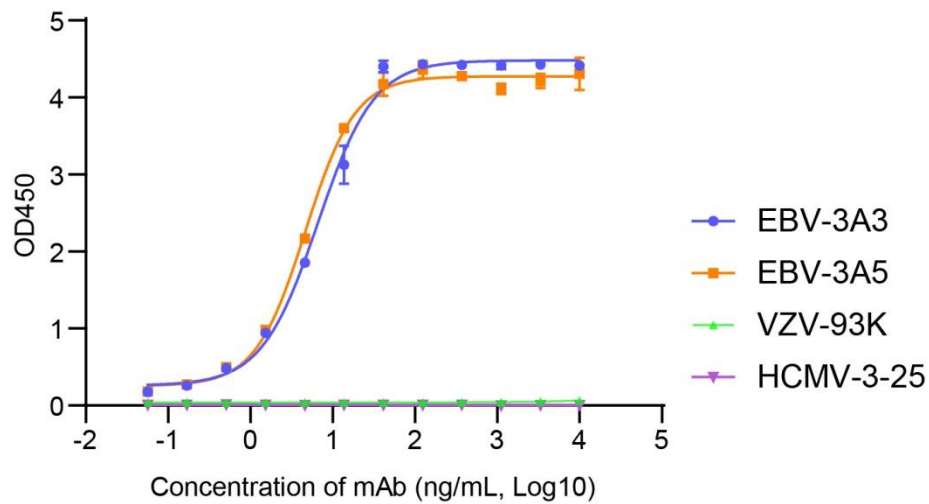

621

622 **Fig S14. The binding activities of different nAbs against EBV, HSV, and HCMV**  
 623 **to EBV-gB were evaluated by ELISA.**

624 3A3 and 3A5 were involved in this study. VZV-specific nAb 93k recognizes D-IV of  
 625 VZV-gB, and HCMV-specific nAb 3-25 recognizes D-II of HCMV-gB.

626

## Supplementary Tables

**Table S1.** Variable region sequences of antibodies

| No. | Antibodies | Chain | Homology             | Gene sequence                                                                                                                                                                                                                                                                                                                                                               |
|-----|------------|-------|----------------------|-----------------------------------------------------------------------------------------------------------------------------------------------------------------------------------------------------------------------------------------------------------------------------------------------------------------------------------------------------------------------------|
| 1   | 3A3        | VH    | Orycun IGHV1S69*01 F | CAGTCAGTGAAGGAGTCCGGGGGTCGCCTGGTACGCCTGGGACAC<br>CCCTGACACTCACCTGCACAGTCTCTGGATTCTCCCTTAGTAGCTATG<br>CAATGAGCTGGGTCCGCCAGGCTCCAGGGAAGGGGCTGGAATACAT<br>CGGAGTCATTTATGCTAGTGGTAGCACATACTACGCGAGCTGGGCGA<br>AAGGCCGATTCACCATCTCCAGAACCGCGACCACGGTGGATCTGAAA<br>ATCACCAGTCCGACAACCGAGGACACGGCCACCTATTTCTGTGGCAG<br>AGGGGTTTCTACTAACATGTGGGGCCCAGGCACCCTGGTACCGTCT<br>CTTCA     |
| 2   | 3A3        | VK    | Orycun IGKV1S34*01 F | GACCTCGTGATGACCCAGACTCCATCCTCCGTGTCTGCAGCTGTGGG<br>AGGCACAGTCACCATCAAGTGCCAGGCCAGTCAGAGCCTTGGTGGT<br>GGTTTAGCCTGGTATCAGCAGAAACCAGGGCAGCGTCCCAAGCTCCT<br>GATCTATTCTGCATCCACTCTGGAATCTGGGGTCCCATCGCGGTTTCA<br>AGGCAGTGGATCTGGGACAGAGTTCACTCTCACCATCAGCGACCTGG<br>AGTGTGCCGATGCTGCCACTTACTACTGTCAAAGCGCTTATGGTCCTA<br>CTAGTAATGGTCTTTTTAATGCTTTCGGCGGAGGGACCAAGGTGGTCA<br>TCAA |
| 3   | 3A5        | VH    | Orycun IGHV1S69*01 F | CAGTCGGTGAAGGAGTCCGGGGGTCGCCTGGTACGCCTGGGACAC<br>CCCTGACACTCACCTGCACAGTCTCTGGATTCTCCCTCAGTAGTTATG<br>AAATGGGCTGGGTCCGCCAGGCTCCAGGGGAGGGGCTGGAATGGAT<br>CGGAACCATTAGTACTGGTGGTAGTTCATACTACGCGAGCTGGGCAA<br>AAGGCCGATTCACCATCTCTAGAACCTCGACCACGGTGGATCTGAAA                                                                                                                   |

|   |      |    |                     |                                                                                                                                                                                                                                                                                                                                                                                                                                                                                                                                                                                                                                                                                                                                                                    |
|---|------|----|---------------------|--------------------------------------------------------------------------------------------------------------------------------------------------------------------------------------------------------------------------------------------------------------------------------------------------------------------------------------------------------------------------------------------------------------------------------------------------------------------------------------------------------------------------------------------------------------------------------------------------------------------------------------------------------------------------------------------------------------------------------------------------------------------|
|   |      |    |                     | ATGACCAGTCTGACAACCGCGGACACGGCCACCTATTTCTGTGCCAG<br>AGGTTATGGTGGTTATGGCATTGGTGCAGGCTACTTTAACATCTGGGG<br>CCCAGGCACCCTGGTCACCGTCTCTTCA                                                                                                                                                                                                                                                                                                                                                                                                                                                                                                                                                                                                                                |
| 4 | 3A5  | VK | Orycun IGKV1S3*02 F | GCCCTCGTGATGACCCAGACTCCATCCTCCGTGTCTGAACCTGTGGG<br>AGGCACAGTCACCATCAAGTGCCAGGCCAGTCAGAGCATTAGTAGTT<br>ACTTAGCCTGGTATCAGCGGAAACCAGGGCAGCGTCCCAAACTCCTG<br>ATCTATGGTACATCCACTCTGGCATCTGGGGTCCCATCGCGGTTTATTG<br>GCAGTGGATCTGGGACAGACTACACTCTCACCATCAGCGACCTGGAA<br>TGTGACGATGCTGCCACTTACTACTGTCAACAGGGTTTTAGTACTAGT<br>AATGTTTATAATTCTTTTCGGCGGAGGGACCAAGGTGGACATCAAA<br>CAGTCAGTGAAGGAGTCCGGGGGTCGCCTGGTCACGCCTGGGACAC<br>CCCTGACACTCACCTGCACCGTCTCTGGAATCGACCTCAGTACCTATG<br>TAATGACTTGGGTCCGCCAGGCTCCAGGGAAGGGGCTGGAATGCATC<br>GGAATCATTGGTTATGGTGGTAGCACATACTACGCGAGCTGGGCGAC<br>AGGCCGATTCACCATCTCCAAAACCTCGACCACGGTGGATCTGAGAA<br>TGACCAGTCTGACAACCGAGGACACGGCCACCTATTTCTGTGCCAGA<br>GGTGTTAGTAGTAATCTTTATAGGGGAATGAATTTGTGGGGCCAAGGC<br>ACCCTGGTCACCGTCTCTTCA |
| 5 | 1E12 | VH |                     | GCCCTCGTGATGACCCAGACTCCATCTCCCGTGTCTGCAGCTGTGGG<br>AGGCACAGTCAGCATCAGTTGCCAGTCCAGTCCGAGTGTTTATAGTA<br>ATTACTTATCCTGGTATCAGCAGAAACCAGGGCAGCCTCCCAAGCTC<br>CTGATCTACGAAACATCCAAACTGGAATCTGGGGTCCCATCGCGGTT<br>CAGCGGCAGTGGATCTGGGACACAGTTCACTCTCACCATCAGCGGCG<br>TGCAATGTGACGATGCTGCCACTTACTACTGTGCAGGCGGTTATAGTG<br>GTATTAGTGATACGTTTGCTTTTCGGCGGAGGGACCAAGGTGGACATC<br>AAA                                                                                                                                                                                                                                                                                                                                                                                         |
| 6 | 1E12 | VK |                     | GCCCTCGTGATGACCCAGACTCCATCTCCCGTGTCTGCAGCTGTGGG<br>AGGCACAGTCAGCATCAGTTGCCAGTCCAGTCCGAGTGTTTATAGTA<br>ATTACTTATCCTGGTATCAGCAGAAACCAGGGCAGCCTCCCAAGCTC<br>CTGATCTACGAAACATCCAAACTGGAATCTGGGGTCCCATCGCGGTT<br>CAGCGGCAGTGGATCTGGGACACAGTTCACTCTCACCATCAGCGGCG<br>TGCAATGTGACGATGCTGCCACTTACTACTGTGCAGGCGGTTATAGTG<br>GTATTAGTGATACGTTTGCTTTTCGGCGGAGGGACCAAGGTGGACATC<br>AAA                                                                                                                                                                                                                                                                                                                                                                                         |

---

**Table S2.** Summary of blocking activity of anti-gB mAbs 3A3, 3A5, 3A3+3A5, 1E12, and the anti-HA mAb 2G9 in the sera from 15 healthy donors and 15 patients with NPC measured by ELISAs with immobilized recombinant gB and flow cytometry assays with membrane-bound gB expressed by 293T cells.

|                                              | Healthy donors (15 sera) |            |            |           |           | Patients with NPC (15 sera) |            |            |           |           |
|----------------------------------------------|--------------------------|------------|------------|-----------|-----------|-----------------------------|------------|------------|-----------|-----------|
|                                              | 3A3                      | 3A5        | 3A3+3A5    | 1E12      | 2G9       | 3A3                         | 3A5        | 3A3+3A5    | 1E12      | 2G9       |
| <b>ELISA with recombinant gB</b>             | 34.63±2.77               | 32.17±2.84 | 71.14±2.74 | 9.55±0.93 | 3.67±0.59 | 41.33±2.32                  | 44.59±2.87 | 74.50±2.51 | 9.53±1.05 | 3.72±0.41 |
| <b>Flow Cytometry with membrane-bound gB</b> | 36.64±5.47               | 30.13±3.78 | 73.40±2.93 | 9.76±1.77 | 4.47±0.79 | 33.89±4.38                  | 31.27±3.87 | 67.04±2.65 | 9.17±1.70 | 3.23±0.51 |
| <b><i>P</i> value</b>                        | 0.75                     | 0.67       | 0.58       | 0.92      | 0.43      | 0.15                        | 0.01       | 0.05       | 0.86      | 0.46      |

The results of ELISAs and flow cytometry assays that used the same sera from 15 healthy donors and 15 patients with NPC are shown as mean ± SEM for each experimental group. *P* values from the unpaired Welch's *t*-tests of whether the results differ between ELISAs and flow cytometry assays are indicated.

**Table S3.** CryoEM data collection and atomic model refinement statistics

|                                           | gB:3A3Fab | gB:3A5Fab | gB:3A3 Fab:3A5 Fab |
|-------------------------------------------|-----------|-----------|--------------------|
| <b>Data collection and processing</b>     |           |           |                    |
| Magnification                             | 93,000    | 93,000    | 23,000             |
| Voltage (kV)                              | 300       | 300       | 300                |
| Electron exposure (e-/Å <sup>2</sup> )    | 30        | 30        | 56                 |
| Defocus range (μm)                        | 1.2-3.5   | 1.2-3.5   | 0.8-2.5            |
| Pixel size (Å)                            | 1.12      | 1.12      | 1.10               |
| Symmetry imposed                          | C3        | C3        | C3                 |
| Final particle images (no.)               | 9,270     | 18,826    | 367,966            |
| Map resolution (Å)                        | 7.1       | 9.0       | 3.9                |
| FSC threshold                             | 0.143     | 0.143     | 0.143              |
| Map sharpening B factor (Å <sup>2</sup> ) | -90       | -90       | -200               |
| <b>Validation</b>                         |           |           |                    |
| MolProbity score                          | /         | /         | 2.21               |
| Clashscore                                | /         | /         | 10.87              |
| Poor rotamers (%)                         | /         | /         | 0.35               |
| <b>Ramachandran plot</b>                  |           |           |                    |
| Favored (%)                               | /         | /         | 85.24              |
| Allowed (%)                               | /         | /         | 14.66              |
| Disallowed (%)                            | /         | /         | 0.10               |

**Table S4.** Primers used in this study

| No. | Instructions for primers                                       | Oligonucleotides                                      |
|-----|----------------------------------------------------------------|-------------------------------------------------------|
| 1   | Forward primer for fusion loop (WY) mutation of wild-type gB   | 5'-TCATCTACAATGGCCACCGCGCGGACTCCGTGACCAACCGGCACGA-3'  |
| 2   | Reverse primer for fusion loop (WY) mutation of wild-type gB   | 5'-TCCGCGCGGTGGCCATTGTAGATGAGAATGTTGGTCACTATCTTGGT-3' |
| 3   | Forward primer for fusion loop (WLIW) mutation of wild-type gB | 5'-GCCCCCGGGCGGGTGGAGGCGACTTACAGAACAAGAACTACCGTCA-3'  |
| 4   | Reverse primer for fusion loop (WLIW) mutation of wild-type gB | 5'-TAAGTCGCCTCCACCCGCCCCGGGGCGTCATAGAGCTCCGTCTGGC-3'  |
| 3   | Forward primer for gB-E345A                                    | 5'-ATCGAAGCCCAGGTGAACAAGACCATGCAT-3'                  |
| 4   | Reverse primer for gB-E345A                                    | 5'-GTTCACCTGGGCTTCGATGCACTTGAAG-3'                    |
| 5   | Forward primer for gB-N348A                                    | 5'-AGAGCAGGTGGCCAAGACCATGCATGAAAA-3'                  |
| 6   | Reverse primer for gB-N348A                                    | 5'-GCATGGTCTTGGCCACCTGCTCTTCGATGCAC-3'                |
| 7   | Forward primer for gB-K349A                                    | 5'-GTGAACGCCACCATGCATGAAAAGTACGAG-3'                  |
| 8   | Reverse primer for gB-K349A                                    | 5'-CATGGTGGCGTTCACCTGCTCTTCGATGCACTTG-3'              |
| 9   | Forward primer for gB-H352A                                    | 5'-ACCATGGCCGAAAAGTACGAGGCCGTC-3'                     |



|    |                             |                                        |
|----|-----------------------------|----------------------------------------|
| 10 | Reverse primer for gB-H352A | 5'-ACTTTTCGGCCATGGTCTTGTTACCTGC-3'     |
| 11 | Forward primer for gB-E353A | 5'-ACCATGCATGCCAAGTACGAGGCCGTC-3'      |
| 12 | Reverse primer for gB-E353A | 5'-CGTACTTGGCATGCATGGTCTTGTTACCTG-3'   |
| 13 | Forward primer for gB-E356A | 5'-AAAGTACGCCGCCGTCCAGGATCGTTACA-3'    |
| 14 | Reverse primer for gB-E356A | 5'-ACGGCGGCGTACTTTTCATGCATGGTCTTG-3'   |
| 15 | Forward primer for gB-Q359A | 5'-CCGTCGCCGATCGTTACACGAAGGGCCAG-3'    |
| 16 | Reverse primer for gB-Q359A | 5'-TAACGATCGGCGACGGCCTCGTACTTTTCA-3'   |
| 17 | Forward primer for gB-D360A | 5'-TCCAGGCCCGTTACACGAAGGGCCAGGAA-3'    |
| 18 | Reverse primer for gB-D360A | 5'-TGTAACGGGCCTGGACGGCCTCGTACTTT-3'    |
| 19 | Forward primer for gB-R388A | 5'-TCTGACCCCGGCCTCGTTGGCCACCGTCAAG-3'  |
| 20 | Reverse primer for gB-R388A | 5'-TGGCCAACGAGGCCGGGGTCAGAGGTAGCCAA-3' |
| 21 | Forward primer for gB-L390A | 5'-CCCGCGCTCGGCCGCCACCGTCAAGAACCTGA-3' |
| 22 | Reverse primer for gB-L390A | 5'-TGACGGTGGCGGCCGAGCGCGGGGTGAGAGGT-3' |
| 23 | Forward primer for gB-R539A | 5'-GTCACCCTGGCCAAGAGCATGAGGGTCCCC-3'   |
| 24 | Reverse primer for gB-R539A | 5'-TCATGCTCTTGGCCAGGGTGACGGTGGCCT-3'   |
| 25 | Forward primer for gB-K540A | 5'-ACCCTGCGCGCCAGCATGAGGGTCCCCGGC-3'   |
| 26 | Reverse primer for gB-K540A | 5'-CTCATGCTGGCGCGCAGGGTGACGGTGGCC-3'   |

|    |                             |                                        |
|----|-----------------------------|----------------------------------------|
| 27 | Forward primer for gB-S558A | 5'-CCCCCTGGTGGCCTTCAGCTTTATCAACGA-3'   |
| 28 | Reverse primer for gB-S558A | 5'-TAAAGCTGAAGGCCACCAGGGGGCGCGAGTAG-3' |
| 29 | Forward primer for gB-T565A | 5'-TATCAACGACGCCAAGACCTACGAGGGACA-3'   |
| 30 | Reverse primer for gB-T565A | 5'-AGGTCTTGGCGTCGTTGATAAAGCTGAAGG-3'   |
| 31 | Forward primer for gB-K566A | 5'-CAACGACACCGCCACCTACGAGGGACAGCT-3'   |
| 32 | Reverse primer for gB-K566A | 5'-CGTAGGTGGCGGTGTCGTTGATAAAGCTGA-3'   |
| 33 | Forward primer for gB-T567A | 5'-CGACACCAAGGCCTACGAGGGACAGCTGGG-3'   |
| 34 | Reverse primer for gB-T567A | 5'-CCTCGTAGGCCTTGGTGTGCGTTGATAAAGC-3'  |
| 35 | Forward primer for gB-H610A | 5'-CGACTACCACGCCTTTAAAACCATCGAGCT-3'   |
| 36 | Reverse primer for gB-H610A | 5'-TTTTAAAGGCGTGGTAGTCGTTGTAGACGT-3'   |
| 37 | Forward primer for gB-F611A | 5'-CTACCACCACGCCAAAACCATCGAGCTGGA-3'   |
| 38 | Reverse primer for gB-F611A | 5'-TGGTTTTGGCGTGGTGGTAGTCGTTGTAGA-3'   |
| 39 | Forward primer for gB-K612A | 5'-CCACCACTTTGCCACCATCGAGCTGGACGG-3'   |
| 40 | Reverse primer for gB-K612A | 5'-CGATGGTGGCAAAGTGGTGGTAGTCGTTGT-3'   |
| 41 | Forward primer for gB-T613A | 5'-CCACTTTAAAGCCATCGAGCTGGACGGCAT-3'   |
| 42 | Reverse primer for gB-T613A | 5'-GCTCGATGGCTTTAAAGTGGTGGTAGTCGT-3'   |

---
